# Supplementary material for: GmDREB1 overexpression affects the expression of microRNAs in GM wheat seeds
Source: PubMed Central journal article supplement (PMC5411081; doi:10.1371/journal.pone.0175924), 2017-05-01

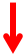

5' AGCAAGUGCCCUGCUUCUCCA 3' Transcript: TC410195:739-759 Slice Site:750  
||| |||||||||||||||||  
3' ACGUGCACGGGACGAAGAGGU 5' Query: tae-miR164

Degradome data file: SRR1197127  
Degardome Category: 0  
Degradome p-value: 0.00141301193607313

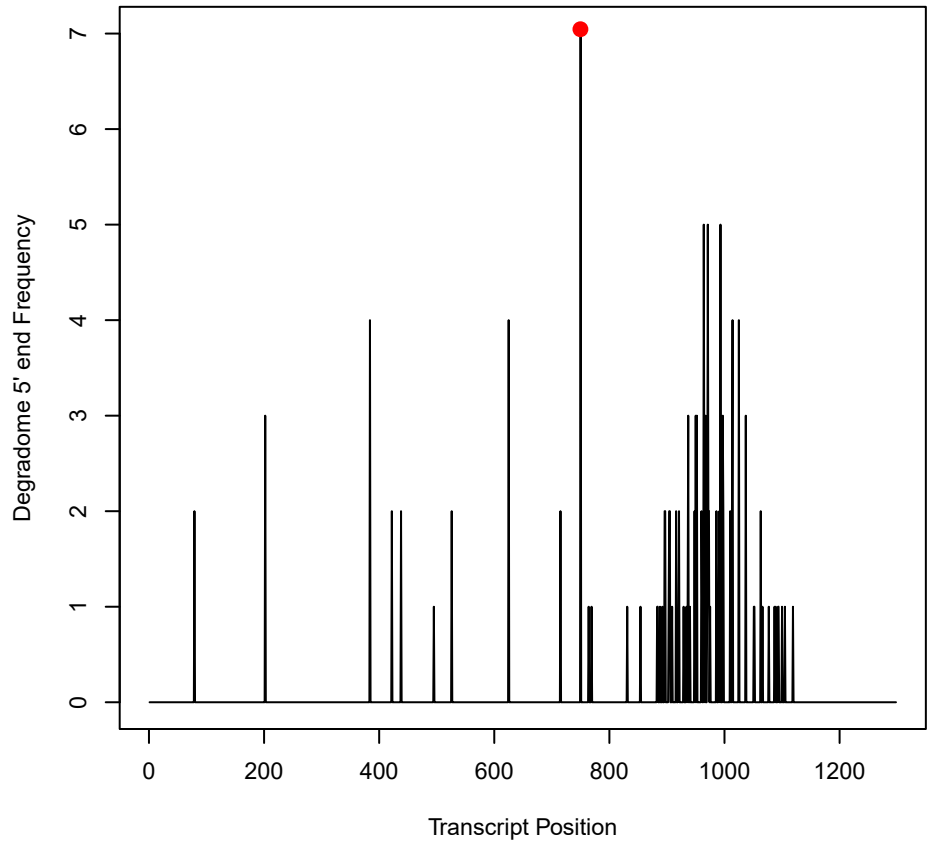

5' AGCAAGUGCCCUGCUUCUCCA 3' Transcript: TC416811:106-126 Slice Site:117  
||| |||||||||||||||||  
3' ACGUGCACGGGACGAAGAGGU 5' Query: tae-miR164

Degradome data file: SRR1197126  
Degradome Category: 0  
Degradome p-value: 0.000419649287547452

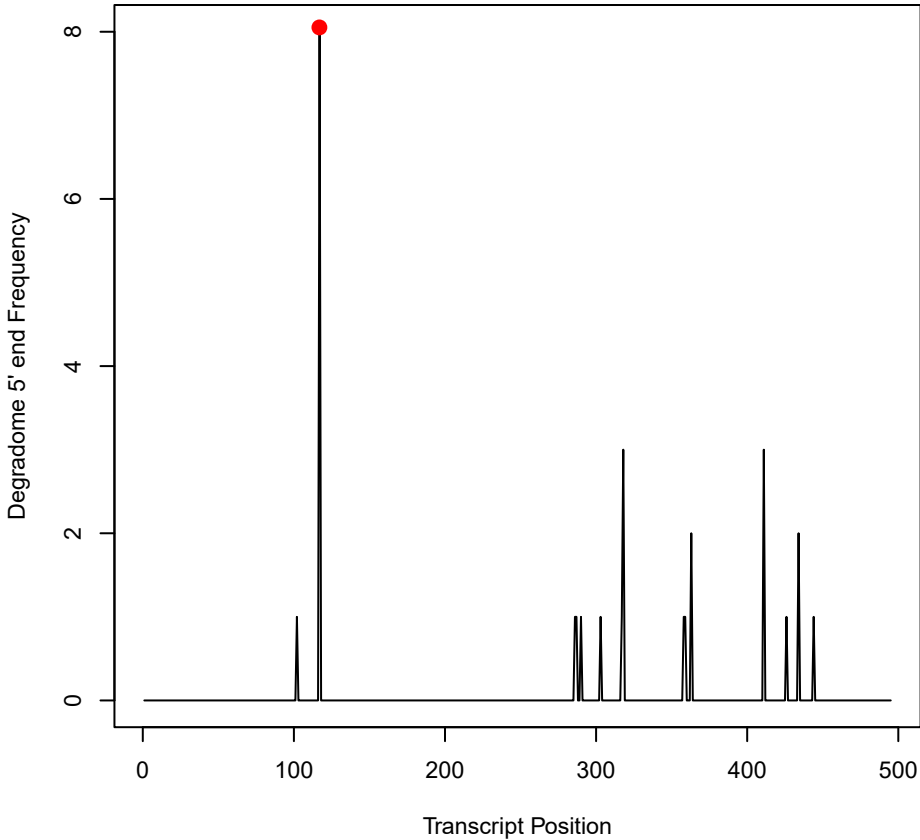

5' AGCAAGUGCCCUGCUUCUCCA 3' Transcript: TC390810:340-360 Slice Site:351  
||||| ||||||||||||||||||||  
3' UCGUGCACGGGACGAAGAGGU 5' Query: tae-miR164c-N13

Degradome data file: SRR1197128  
Degardome Category: 0  
Degradome p-value: 0.000841342606561657

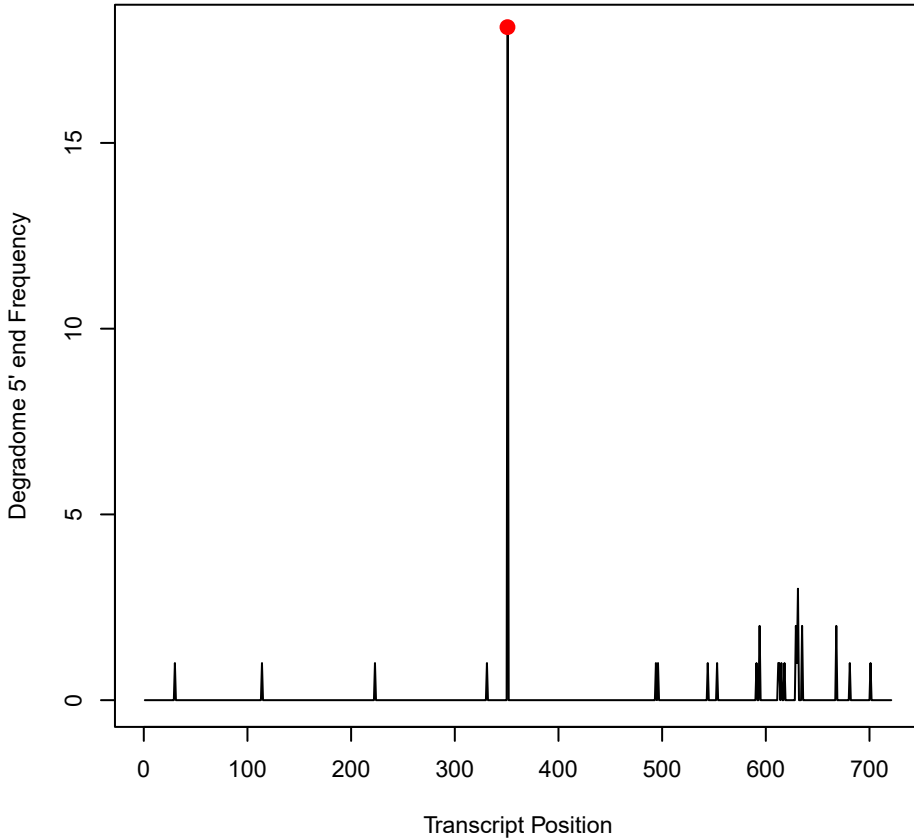

5' AGCAAGUGCCCCUGCUUCUCCA 3' Transcript: TC394945:240-260 Slice Site:251  
 ||||| ||||||||||||||||||||  
 3' UCGUGCACGGGACGAAGAGGU 5' Query: tae-miR164c-N13

Degradome data file: SRR1197126  
 Degradome Category: 0  
 Degradome p-value: 0.00293384938232144

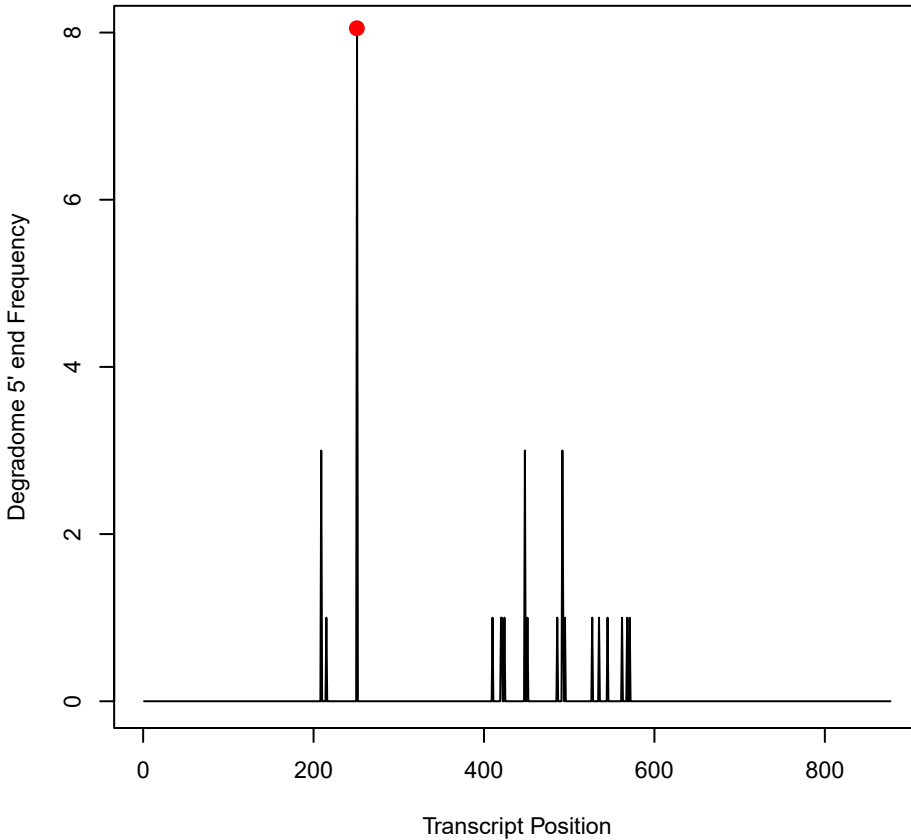

5' AGCAAGUGCCCUGCUUCUCCA 3' Transcript: TC410195:739-759 Slice Site:750  
||||| ||||||||||||||||||||  
3' UCGUGCACGGGACGAAGAGGU 5' Query: tae-miR164c-N13

Degradome data file: SRR1197126  
Degardome Category: 0  
Degradome p-value: 0.00167754081262195

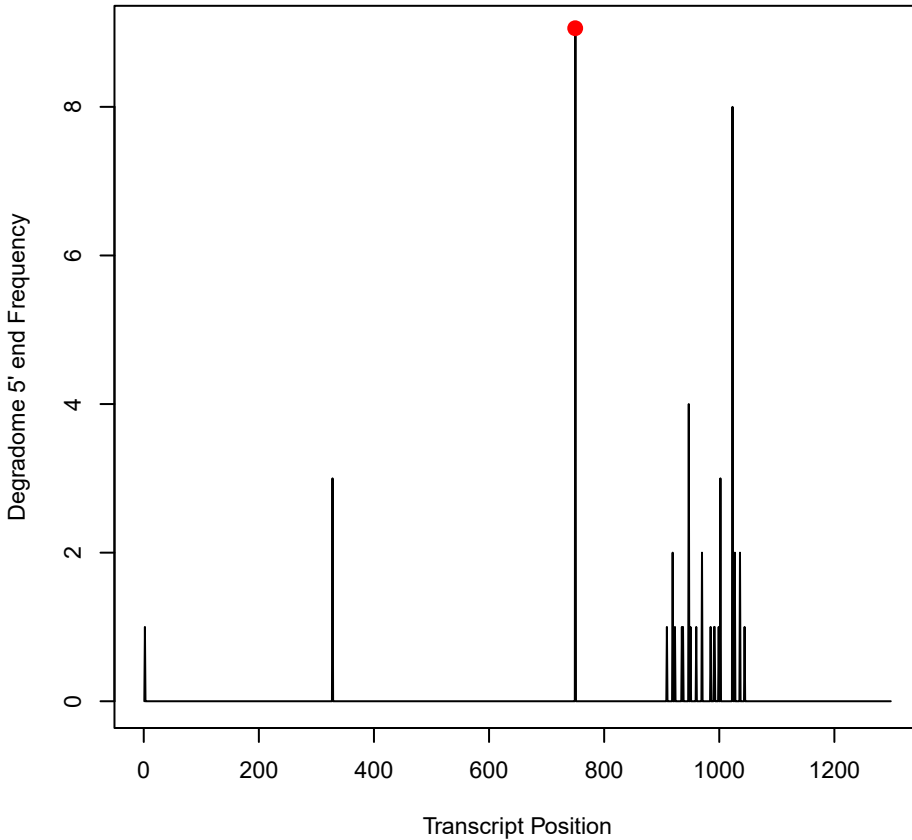

5' AGCAAGUGCCCUGCUUCUCCA 3' Transcript: TC429623:744-764 Slice Site:755  
||||| |||||||||||||||||||  
3' UCGUGCACGGGACGAAGAGGU 5' Query: tae-miR164c-N13

Degradome data file: SRR1197126  
Degardome Category: 0  
Degradome p-value: 0.00251525562000277

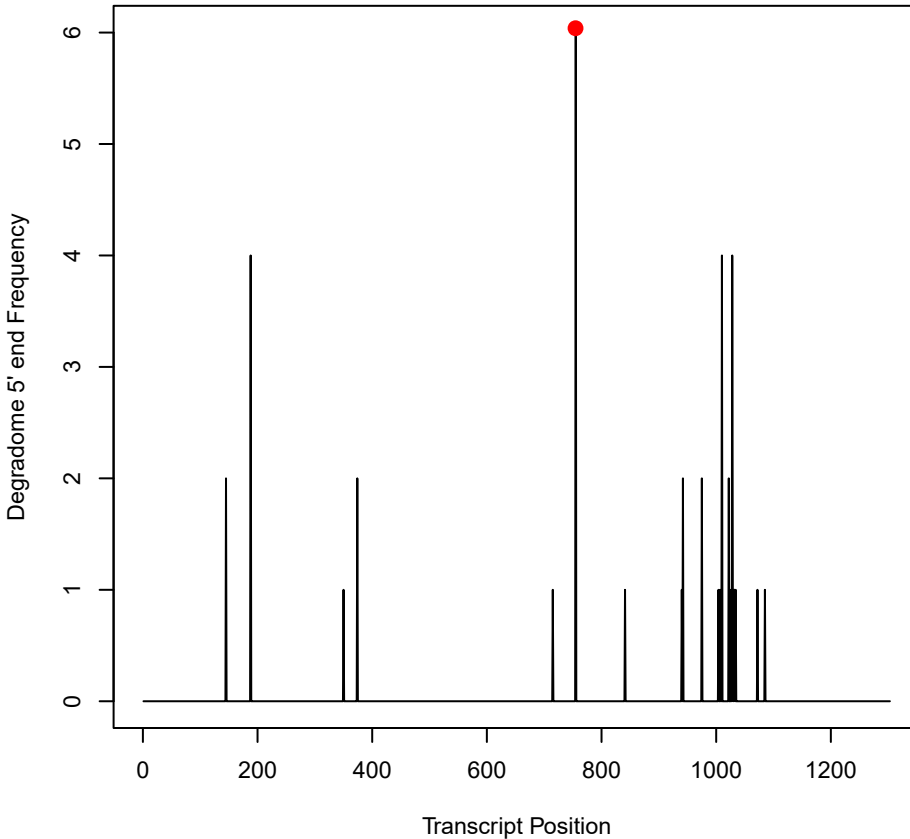

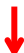

5' UAGUUCAAGACAAGCUGUGGA 3' Transcript: CA603835:311-331 Slice Site:322  
o ||||| |||||  
3' GUCAAGUUCU-UUCGACACCU 5' Query: tae-miR396c-N12a,b

Degradome data file: GSM911924  
Degardome Category: 0  
Degradome p-value: 0.00111846811950223

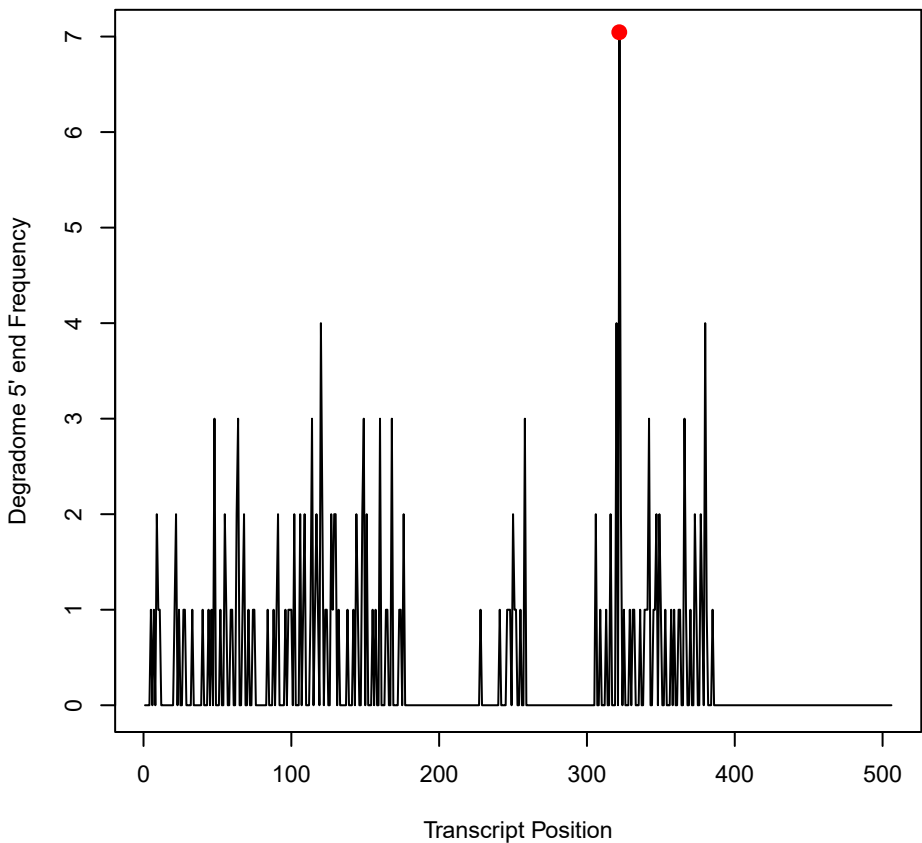







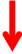

5' CCGAUCAAGAGAGCCUGUGGA 3' Transcript: CK209519:536-556 Slice Site:547

|||||||o|||||||

3' GUCAAGUUCUUUCGGACACCU 5' Query: tae-miR396g-N15

Degradome data file: GSM911924

Degradome Category: 0

Degradome p-value: 0.00223568526807016

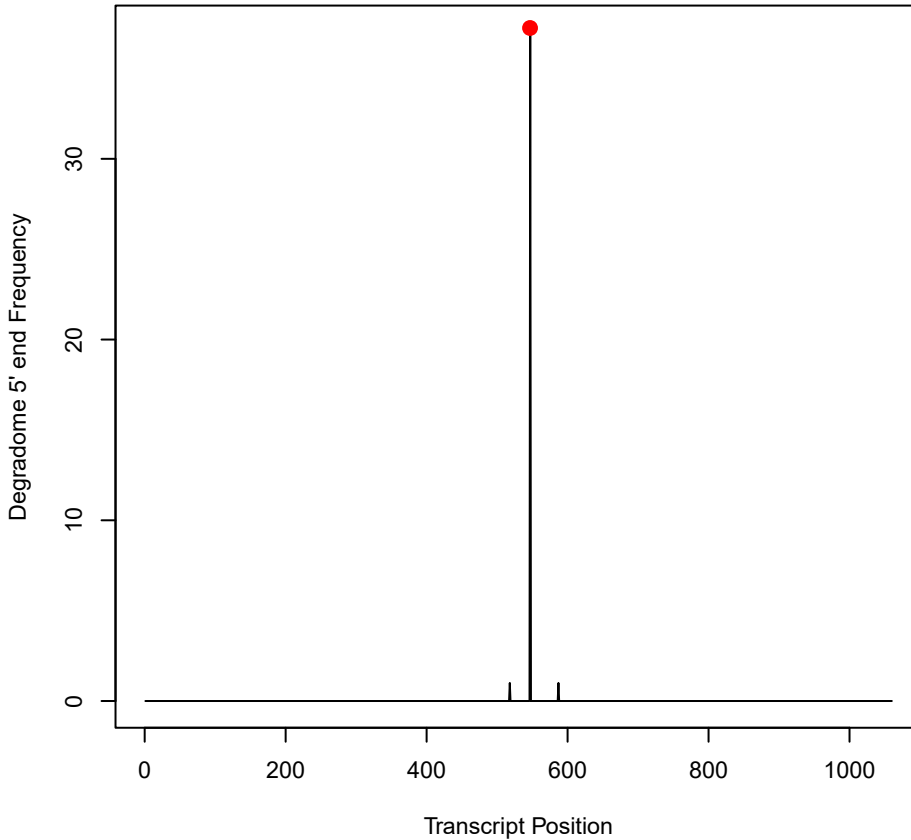

Supplement: pone.0175924.s001.pdf [file pone.0175924.s001.pdf]
