# Supplementary material for: GmDREB1 overexpression affects the expression of microRNAs in GM wheat seeds
Source: PubMed Central journal article supplement (PMC5411081; doi:10.1371/journal.pone.0175924), 2017-05-01

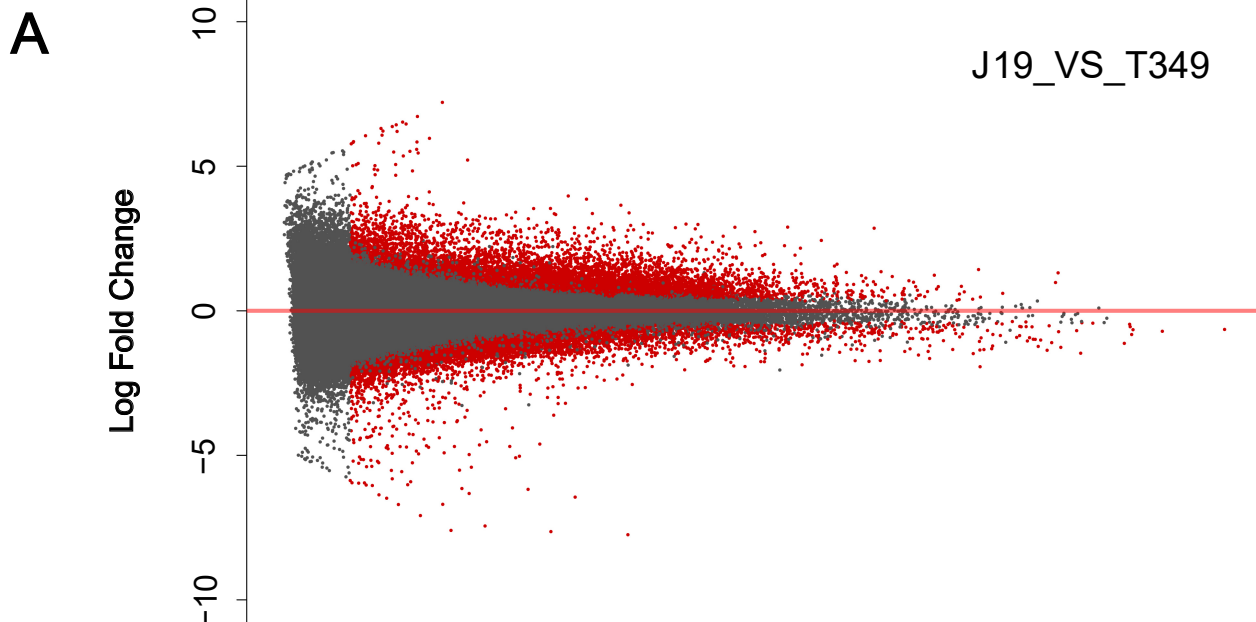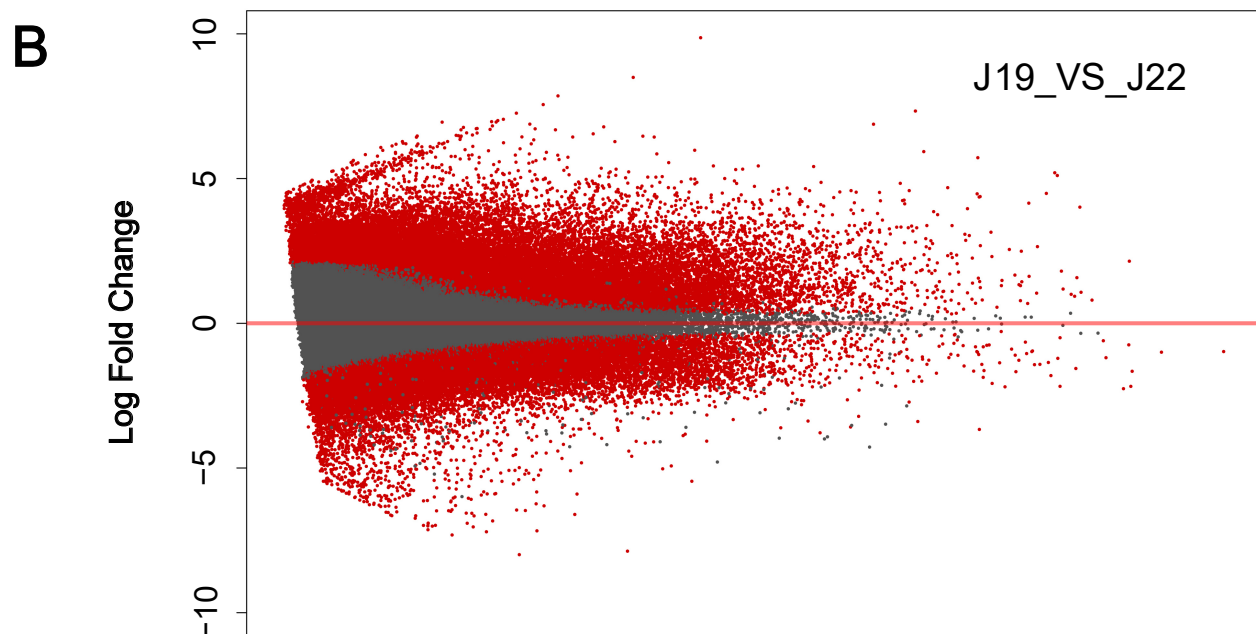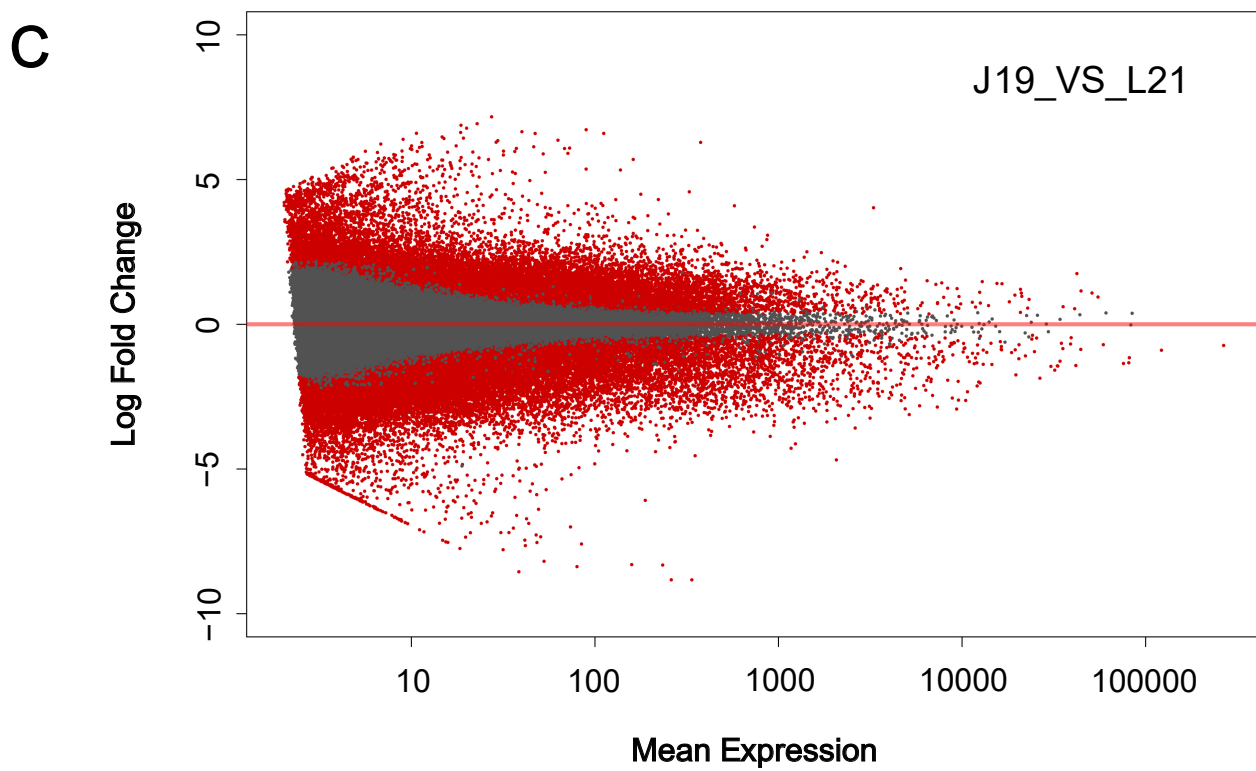

Supplement: pone.0175924.s004.pdf [file pone.0175924.s004.pdf]
