# Supplementary material for: GmDREB1 overexpression affects the expression of microRNAs in GM wheat seeds
Source: PubMed Central journal article supplement (PMC5411081; doi:10.1371/journal.pone.0175924), 2017-05-01
Supplement: pone.0175924.s007.pdf [file pone.0175924.s007.pdf]

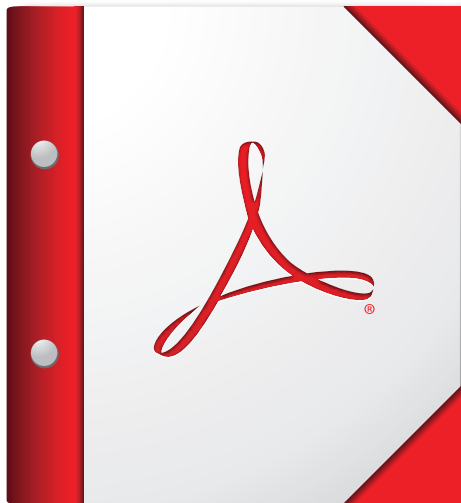

为获得最佳体验，请在 **Acrobat 9、Adobe Reader 9**  
或更高版本中打开此 **PDF** 包。

[立即购买 Adobe Reader !](#)
